# Supplementary material for: Four Zn(ii)-5-(2-carboxy-phenoxy)-1,3-benzenedicarboxylate coordination polymers induced by different N-ligands: synthesis, structure, and fluorescence detection for BPA and IMH
Source: Royal Society of Chemistry journal article supplement (doi:10.1039/d3ce00179b), 2023-01-01
Supplement: d3ce00179b1.pdf [file d3ce00179b1.pdf]

## Supporting Information

### Figure captions:

**Fig. S1** The PXRD patterns of **1-4**

**Fig.S2** The IR spectra of the complexes (a) **1** (b) **2** (c) **3** (d) **4**

**Fig. S3** The excitation spectra of **1-4** and the ligands

**Fig. S4** PXRD patterns of **1** in solutions with pH = 4, 7, 11

**Fig. S5** The PXRD after immersion of **1** in different solvents

**Fig. S6** The response time of **1** toward BPA (inset: emission spectra of **1** before (0 s) and after (10 s) the addition of BPA) (a); The response time of **1** toward IMH (inset: emission spectra of **1** before (0 s) and after (10 s) the addition of IMH) (b)

**Fig. S7** The recycling experiments of **1** after luminescent sensing for BPA

**Fig. S8** The recycling experiments of **1** after luminescent sensing for IMH

**Fig. S9** PXRD patterns of **1** immersed in different solutions including BPA/IMH solution for 3 days

**Table S1.** Selected bond lengths [ $\text{\AA}$ ] and angles [ $^\circ$ ] for complexes **1-4**

**Table S2.** A comparison of the analysis time of BPA with other reported methods

**Table S3.** A comparison of the analysis time of IMH with other reported methods

**Fig. S1** The PXRD patterns of **1-4**

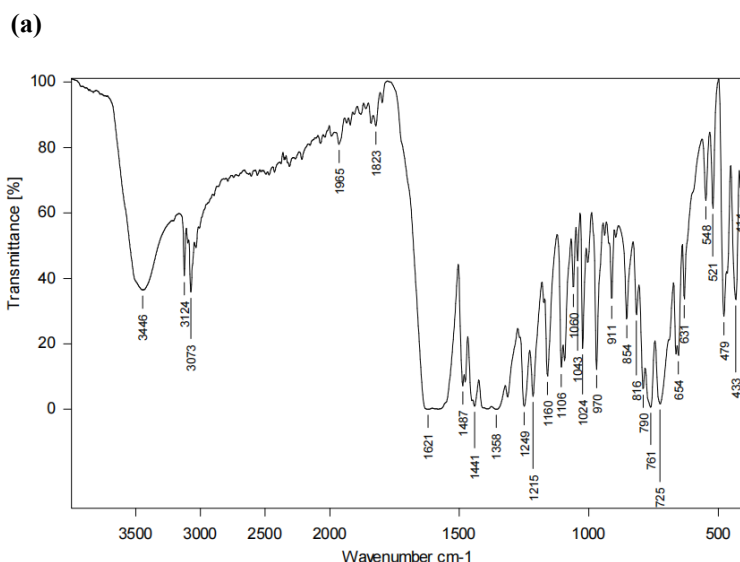

(b)

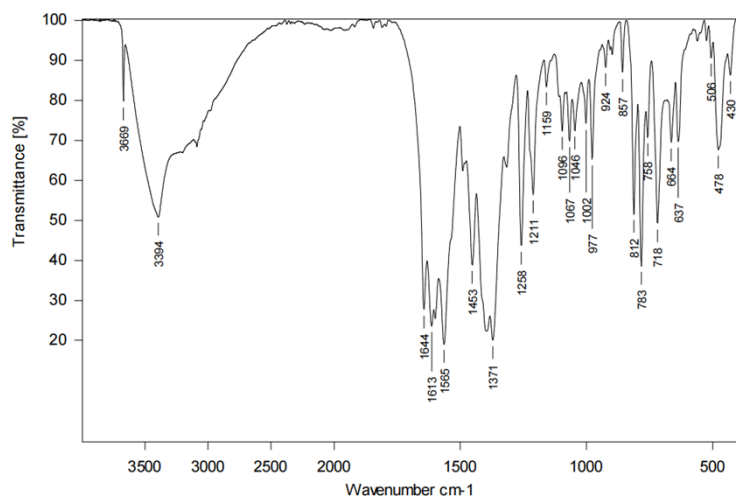

(c)

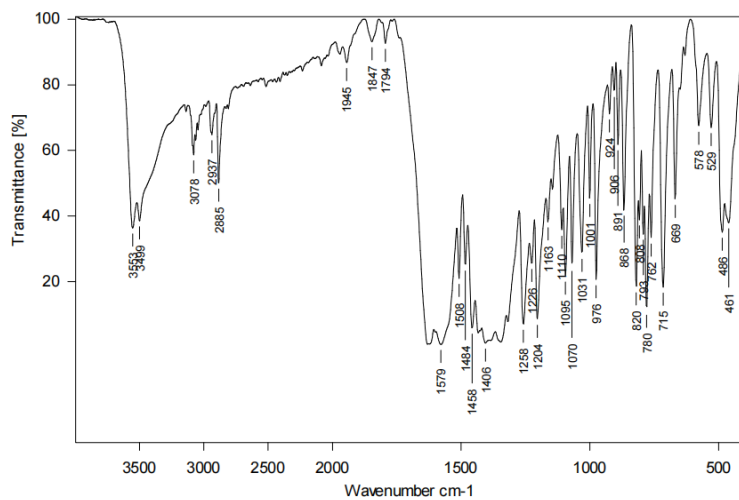

(d)

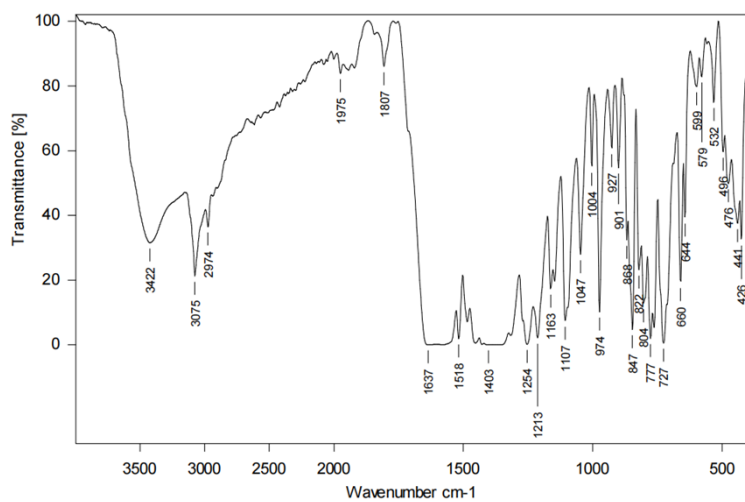

Fig.S2 The IR spectra of the complexes (a) 1 (b) 2 (c) 3 (d) 4

**Fig. S3** The excitation spectra of **1-4** and the ligands

The excitation spectra of **1-4** all showed wide excitation bands at 275nm for **1**, 279nm for **2**, 286nm for **3**, and 276nm for **4**, respectively. The excitation spectra of O-cpiaH<sub>3</sub>, 2,2'-bpy, 4,4'-bpy, bpp and phen were recorded at  $\lambda_{em}$ =344nm, 366nm, 367nm, 433nm and 362nm, respectively. A wide excitation band can be seen near 276nm (O-cpia), 272nm (2,2'-bpy), 278nm (4,4'-bpy), 362nm (bpp), 272nm (phen).

**Fig. S4** The PXRD patterns of **1** in solutions with pH = 4, 7, 11

**Fig.S5** The PXRD after immersion of **1** in different solvents

(a)

(b)

**Fig.S6** The response time of **1** toward BPA (inset: emission spectra of **1** before (0 s) and after (10 s) the addition of BPA) (a); The response time of **1** toward IMH (inset: emission spectra of **1** before (0 s) and after (10 s) the addition of IMH) (b)

**Fig.S7** The recycling experiments of **1** after luminescent sensing for BPA

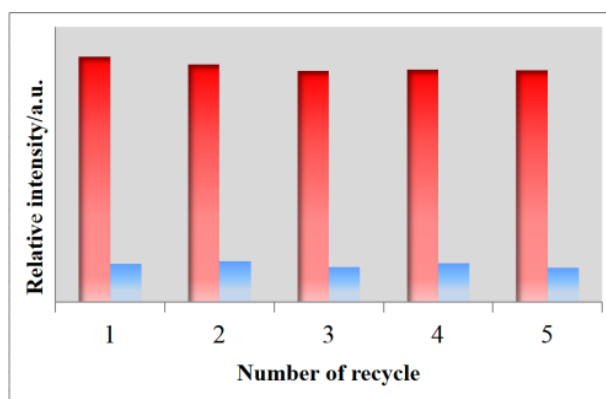

**Fig.S8** The recycling experiments of **1** after luminescent sensing for IMH

**Fig. S9** The PXRD patterns of **1** immersed in different solutions including BPA/IMH solution for 3 days

**Table S1** Selected bond lengths [ $\text{\AA}$ ] and angles [ $^\circ$ ] for complexes **1-4**

| 1                 |            |                   |            |
|-------------------|------------|-------------------|------------|
| Zn(1)-O(4)A       | 1.938(2)   | Zn(2)-O(8)A       | 2.050(2)   |
| Zn(1)-O(2)        | 1.952(2)   | Zn(2)-O(6)B       | 2.113(2)   |
| Zn(1)-O(3)A       | 2.805(9)   | Zn(2)-N(2)        | 2.120(3)   |
| Zn(1)-O(8)A       | 1.968(2)   | Zn(2)-N(1)        | 2.148(3)   |
| Zn(1)-O(7)B       | 1.982(2)   | Zn(2)-O(8)C       | 2.150(2)   |
|                   |            | Zn(2)-O(1)        | 2.196(2)   |
| O(4)A-Zn(1)-O(2)  | 109.72(10) | N(2)-Zn(2)-N(1)   | 76.95(11)  |
| O(4)A-Zn(1)-O(8)A | 112.69(10) | O(8)A-Zn(2)-O(8)C | 79.30(10)  |
| O(2)-Zn(1)-O(8)A  | 114.54(10) | O(6)B-Zn(2)-O(8)C | 175.57(9)  |
| O(4)A-Zn(1)-O(7)B | 108.44(10) | N(2)-Zn(2)-O(8)C  | 91.24(10)  |
| O(2)-Zn(1)-O(7)B  | 103.90(10) | N(1)-Zn(2)-O(8)C  | 94.91(10)  |
| O(8)A-Zn(1)-O(7)B | 106.98(10) | O(8)A-Zn(2)-O(1)  | 90.47(9)   |
| O(8)A-Zn(2)-O(6)B | 96.34(10)  | O(6)B-Zn(2)-O(1)  | 91.24(10)  |
| O(8)A-Zn(2)-N(2)  | 170.53(10) | N(2)-Zn(2)-O(1)   | 89.53(10)  |
| O(6)B-Zn(2)-N(2)  | 93.13(10)  | N(1)-Zn(2)-O(1)   | 165.82(10) |
| O(8)A-Zn(2)-N(1)  | 103.58(10) | O(8)C-Zn(2)-O(1)  | 89.57(9)   |
| O(6)B-Zn(2)-N(1)  | 85.33(10)  |                   |            |

1: A:  $-x+1,-y,-z-1$ ; B:  $-x,-y-1,-z-1$ ; C:  $-x,-y,-z-1$ ; D:  $x,y-1,z$ ;

| 2           |          |             |          |
|-------------|----------|-------------|----------|
| Zn(1)-O(4)A | 1.970(2) | Zn(2)-O(6)B | 1.935(2) |

|                   |            |                   |            |
|-------------------|------------|-------------------|------------|
| Zn(1)-N(1)        | 2.076(2)   | Zn(2)-O(7)C       | 1.936(2)   |
| Zn(1)-O(8)D       | 2.0901(19) | Zn(2)-O(8)D       | 1.9364(19) |
| Zn(1)-O(8)        | 2.0907(19) | Zn(2)-O(1)        | 1.938(2)   |
| Zn(1)-O(2)        | 2.120(2)   |                   |            |
| O(4)A-Zn(1)-N(1)  | 106.39(9)  | O(8)D-Zn(1)-O(2)  | 90.04(8)   |
| O(4)A-Zn(1)-O(8)D | 104.90(8)  | O(8)-Zn(1)-O(2)   | 164.74(9)  |
| N(1)-Zn(1)-O(8)D  | 148.70(9)  | O(6)B-Zn(2)-O(7)C | 126.34(10) |
| O(4)A-Zn(1)-O(8)  | 97.39(8)   | O(6)B-Zn(2)-O(8)D | 105.34(8)  |
| N(1)-Zn(1)-O(8)   | 96.33(9)   | O(7)C-Zn(2)-O(8)D | 108.24(9)  |
| O(8)D-Zn(1)-O(8)  | 79.36(8)   | O(6)B-Zn(2)-O(1)  | 107.20(10) |
| O(4)A-Zn(1)-O(2)  | 95.92(9)   | O(7)C-Zn(2)-O(1)  | 100.62(9)  |
| N(1)-Zn(1)-O(2)   | 87.01(9)   | O(8)D-Zn(2)-O(1)  | 108.06(9)  |

2 : A:  $-x+1,y,-z+1/2$ ; B:  $x,y+2,z$ ; C:  $-x,y,-z+1/2$ ;

3

|                  |            |                   |            |
|------------------|------------|-------------------|------------|
| Zn(1)-O(1)       | 1.9250(7)  | Zn(2)-O(5)A       | 1.9664(7)  |
| Zn(1)-O(1)       | 1.9250(7)  | Zn(2)-O(7)        | 1.9865(15) |
| Zn(1)-N(2)C      | 2.0542(10) | Zn(2)-O(4)        | 1.9917(8)  |
| Zn(1)-N(2)       | 2.0542(10) | Zn(2)-N(1)B       | 2.0385(9)  |
|                  |            | Zn(2)-O(6)        | 2.4548(17) |
| O(1)-Zn(1)-O(1)  | 119.03(5)  | O(7)-Zn(2)-O(4)   | 93.21(5)   |
| O(1)-Zn(1)-N(2)C | 118.84(3)  | O(5)A-Zn(2)-N(1)B | 106.09(3)  |
| O(1)-Zn(1)-N(2)C | 101.86(4)  | O(7)-Zn(2)-N(1)B  | 134.40(4)  |
| O(1)-Zn(1)-N(2)  | 101.86(4)  | O(4)-Zn(2)-N(1)B  | 96.64(4)   |
| O(1)-Zn(1)-N(2)  | 118.84(3)  | O(5)A-Zn(2)-O(6)  | 96.15(5)   |
| N(2)C-Zn(1)-N(2) | 94.63(5)   | O(7)-Zn(2)-O(6)   | 57.64(5)   |
| O(5)A-Zn(2)-O(7) | 107.66(5)  | O(4)-Zn(2)-O(6)   | 141.05(5)  |
| O(5)A-Zn(2)-O(4) | 118.69(3)  | N(1)B-Zn(2)-O(6)  | 89.18(4)   |

3: A:  $x+1,y,z$ ; B:  $-x,y-1/2,-z-1/2$ ; C:  $-x-1,-y,-z-1$ ;

4

|              |          |             |          |
|--------------|----------|-------------|----------|
| Zn(1)-O(3)   | 2.053(2) | Zn(3)-O(5)D | 1.940(2) |
| Zn(1)-O(16)C | 2.105(2) | Zn(3)-O(7)  | 1.966(3) |
| Zn(1)-O(1)   | 2.121(3) | Zn(3)-O(9)  | 1.969(2) |
| Zn(1)-N(2)   | 2.150(3) | Zn(3)-O(10) | 1.972(3) |
| Zn(1)-N(1)   | 2.156(3) | Zn(3)-O(6)D | 2.793(3) |
| Zn(1)-O(3)A  | 2.181(3) | Zn(4)-O(11) | 2.067(3) |
| Zn(2)-O(13)B | 1.942(3) | Zn(4)-O(9)  | 2.090(2) |
| Zn(2)-O(15)C | 1.947(2) | Zn(4)-O(9)B | 2.128(3) |
| Zn(2)-O(3)   | 1.976(2) | Zn(4)-O(8)  | 2.143(3) |

|                     |            |                    |            |
|---------------------|------------|--------------------|------------|
| Zn(2)-O(2)          | 1.993(3)   | Zn(4)-N(4)         | 2.154(3)   |
| Zn(2)-O(14)B        | 2.6939(3)  | Zn(4)-N(3)         | 2.164(3)   |
| O(13)B-Zn(2)-O(15)C | 111.76(11) | O(16)C-Zn(1)-N(1)  | 165.15(12) |
| O(13)B-Zn(2)-O(3)   | 118.15(11) | O(1)-Zn(1)-N(1)    | 84.14(12)  |
| O(15)C-Zn(2)-O(3)   | 107.88(11) | N(2)-Zn(1)-N(1)    | 77.39(12)  |
| O(13)B-Zn(2)-O(2)   | 105.97(11) | O(3)-Zn(1)-O(3)A   | 80.93(10)  |
| O(15)C-Zn(2)-O(2)   | 105.27(12) | O(16)C-Zn(1)-O(3)A | 87.61(10)  |
| O(3)-Zn(2)-O(2)     | 106.94(10) | O(1)-Zn(1)-O(3)A   | 172.47(10) |
| O(5)D-Zn(3)-O(7)    | 111.36(11) | N(2)-Zn(1)-O(3)A   | 88.19(11)  |
| O(5)D-Zn(3)-O(9)    | 111.97(11) | N(1)-Zn(1)-O(3)A   | 92.51(11)  |
| O(7)-Zn(3)-O(9)     | 109.65(11) | O(11)-Zn(4)-O(9)   | 94.32(11)  |
| O(5)D-Zn(3)-O(10)   | 108.26(11) | O(11)-Zn(4)-O(9)B  | 173.39(11) |
| O(7)-Zn(3)-O(10)    | 105.01(12) | O(9)-Zn(4)-O(9)B   | 79.08(10)  |
| O(9)-Zn(3)-O(10)    | 110.36(11) | O(11)-Zn(4)-O(8)   | 91.82(13)  |
| O(5)D-Zn(3)-Zn(4)   | 151.81(8)  | O(9)-Zn(4)-O(8)    | 91.63(10)  |
| O(7)-Zn(3)-Zn(4)    | 88.81(8)   | O(9)B-Zn(4)-O(8)   | 88.68(10)  |
| O(9)-Zn(3)-Zn(4)    | 40.42(7)   | O(11)-Zn(4)-N(4)   | 84.70(13)  |
| O(10)-Zn(3)-Zn(4)   | 83.80(8)   | O(9)-Zn(4)-N(4)    | 103.20(11) |
| O(3)-Zn(1)-O(16)C   | 91.17(10)  | O(9)B-Zn(4)-N(4)   | 96.46(10)  |
| O(3)-Zn(1)-O(1)     | 93.27(10)  | O(8)-Zn(4)-N(4)    | 164.96(11) |
| O(16)C-Zn(1)-O(1)   | 97.37(11)  | O(11)-Zn(4)-N(3)   | 94.79(12)  |
| O(3)-Zn(1)-N(2)     | 169.10(11) | O(9)-Zn(4)-N(3)    | 170.86(11) |
| O(16)C-Zn(1)-N(2)   | 87.77(11)  | O(9)B-Zn(4)-N(3)   | 91.81(11)  |
| O(1)-Zn(1)-N(2)     | 97.62(11)  | O(8)-Zn(4)-N(3)    | 88.94(11)  |
| O(3)-Zn(1)-N(1)     | 103.53(11) | N(4)-Zn(4)-N(3)    | 76.82(12)  |

4: A: x+1,y,z; B: x,y-1,z; C: -x+1,-y+2,-z+1; D: -x+2,-y+1,-z+1;

**Table S2** A comparison of the analysis time of BPA with other reported methods

| Method                       | Analysis  | Reference |
|------------------------------|-----------|-----------|
| Electrochemistry             | 2 h       | S1        |
| GC-MS                        | 21.63 min | S2        |
| Molecular imprinting methods | 250 s     | S3        |
| LC-MS                        | 7 min     | S4        |
| Photoelectrochemistry        | 110s      | S5        |
| Polarizing microscope        | 1h        | S6        |
| Luminescent detection        | 10 s      | This work |

**Table S3** A comparison of the analysis time of IMH with other reported methods

| Method                    | Analysis time | Reference |
|---------------------------|---------------|-----------|
| RP-HPLC                   | 3.33 min      | S7        |
| PVC membrane              | 5s            | S8        |
| UHPLC–Q-TOF–MS            | 20 min        | S9        |
| Spectrofluorimetric       | 1h            | S10       |
| Flow injection            | 3 h           | S11       |
| Electroanalytical methods | 3h            | S12       |
| Luminescent detection     | 10 s          | This work |

## References

- 1 B. Nikahd, M.A Khalilzadeh, *J. Mol. Liq.*, 2016, **215**, 253–257.
- 2 S.H. Chung, W.H. Ding, *J. Phar., Biomed. Anal.*, 2018, **149**, 572–5763.
- 3 N. Singh, K.K. Reza, M.A. Ali, V.V. Agrawal, A.J.B. Biradar, *Biosens. Bioelectron.*, 2015, **68**, 633-641.
- 4 B.A. Rocha, B.R. da Costa, N.C. de Albuquerque, A.R. de Oliveira, J.M. Souza, M. Al-Tameemi, A.D. Campiglia and F. Barbosa, Jr., *Talanta*, 2016, **154**, 511-519.
- 5 Y. Qiao, J. Li, H. Li, H. Fang, D. Fan, W. Wang, *Biosens. Bioelectron.*, .2016, **86**, 315-320.
- 6 H. Ren, Z. An, C.-H. Jang, *Microchem. J.*, 2019, **146**, 1064-1071.
- 7 Srikantha D, Raju RR, *Indian J. Pharm. Sci.*, 2015, **77**(3), 343–347.
- 8 Y. Subasi, G. S, Kanberoglu, F. Coldur, O. Cubuk, MehmetZahmakiran, *Chem. Pap.*, 2022, **76**, 5105-5117.
- 9 Zhao J, Shin Y, Chun K-H, Yoon H-R, Lee J, *J. Chromatogr. Sci.*, 2016, **54**(4), 561-568.
- 10 Abdel-Salam M., Issa A.S., Mahrous M. ,AbdelHamid M.E, *Anal.Lett.*, 1985, **18**, 1391-1403.
- 11 Pérez-Ruiz T., Martínez-Lozano C., Sanz A., Alonso C., *Talanta*, 1994, **41**, 1523-1527.
- 12 Eslami E., Farjami F., Azar P.A., Tehrani M.S., *Electroanalysis*, 2014, **26**, 424-431.
